# Supplementary material
Source: PubMed Central journal article supplement (PMC2718361)
Supplement: 0900510106_0900510106SI.pdf [file 0900510106_0900510106SI.pdf]

# Supporting Information

Wang et al. 10.1073/pnas.0900510106

## SI Text

**Single-Cell Ca<sup>2+</sup> and Fluorescence Video Imaging.** L625.7 fibroblasts ( $3.5 \times 10^5$ /mL) were pulsed with 1  $\mu$ g/mL Ttox (830–843) peptide at 37 °C overnight. T8.1 cells ( $5 \times 10^5$ ) were incubated for 20 min at 37 °C with 1  $\mu$ M Fura-2/AM (Molecular Probes) in 1 mL of a 10 mM Hepes buffer, (140 mM NaCl, 5 mM KCl, 1 mM CaCl<sub>2</sub>, 0.5 mM MgCl<sub>2</sub>, 1 mM Na<sub>2</sub>HPO<sub>4</sub>, and 1 mg/mL glucose, pH 7.5). After washing twice, T8.1 cells were added to APCs and Fura-2 fluorescence were followed with a TE300 inverted microscope using Metafluor imaging system (Universal Imaging). Transmission light images were taken every 10 s in turn with intracellular calcium measurement (340 nm and 380 nm excitation; 510 nm emission). Ca<sup>2+</sup> response from more than 30 individual conjugates of each group was calculated. To avoid a filter effect on the averaged Ca<sup>2+</sup> trace due to the asynchrony of the individual responses, the peak Ca<sup>2+</sup> responses of all cells were synchronized before averaging.

**Tyrosine Phosphorylation and Immunoprecipitation Assay.** GTP-T8.1, ADAP-T8.1, or M12-T8.1 cells were either left unstimu-

lated or incubated with anti-CD3 at 4 °C followed by cross-linking with anti-hamster at 37 °C for 15 min. Alternatively, cells were incubated with Ttox peptide pulsed L625.7 cells as described in ref. 21. Cells were then harvested for immunoblotting with anti-4G10 or immunoprecipitation with anti-ADAP.

**ELISA.** GTP-T8.1, ADAP-T8.1, or M12-T8.1 cells ( $2 \times 10^5$ ) were cultured in various concentrations of anti-CD3- or anti-CD11a-coated plates for 40 h. The supernatants were collected, and IL-2 was measured using ELISA with rat anti-mouse IL-2 monoclonal antibody (ELISA Capture) and biotinylated rat anti-mouse IL-2 monoclonal antibody (ELISA Detection).

**Statistical Analysis.** Results are given as the mean  $\pm$  SD. The difference between means was tested using unpaired student *t* test using GraphPad Prism version 3.02. *P* < 0.05 was considered significant.

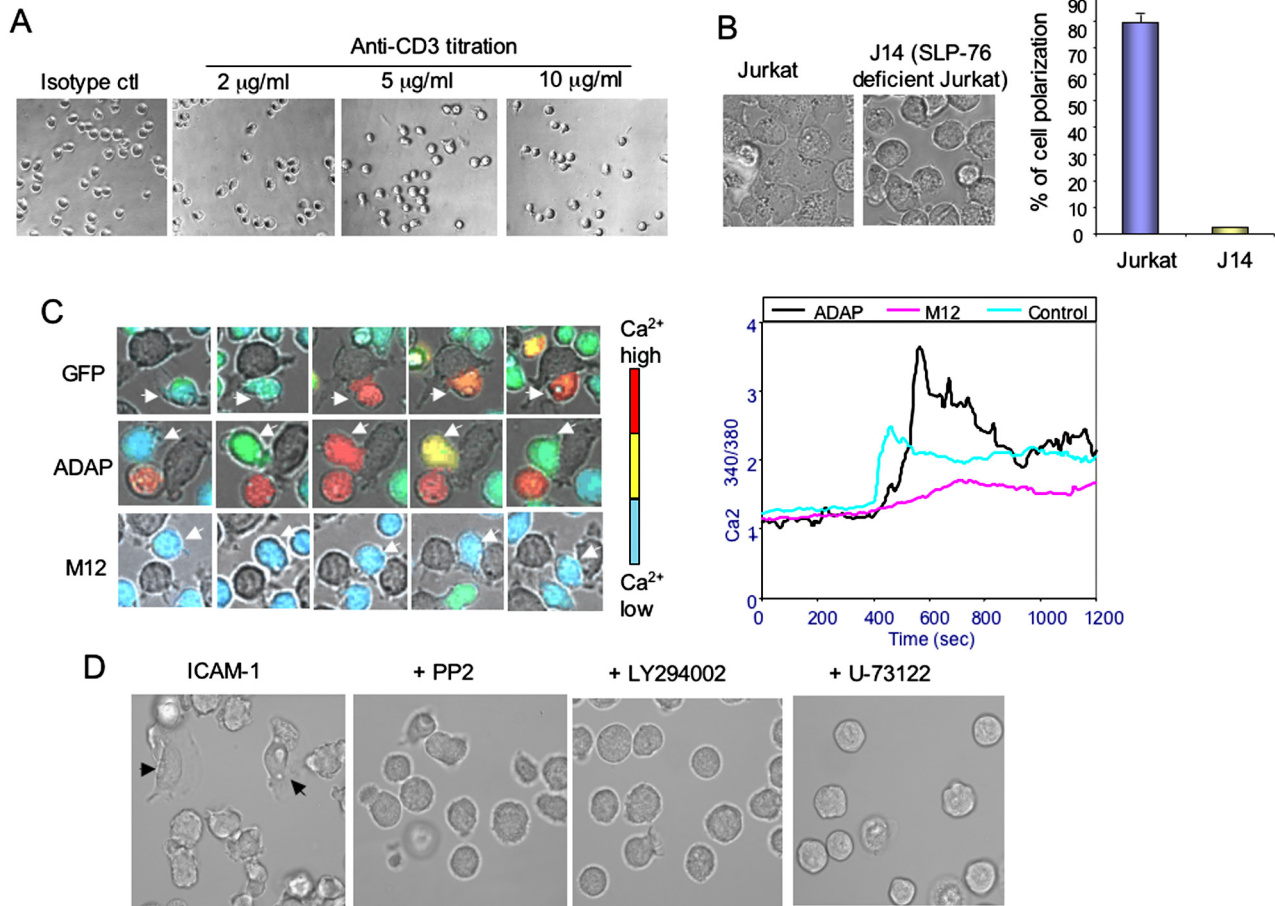

**Fig. 51.** SLP-76-ADAP regulates LFA-1 induced cell polarization and peptide-APC induced Ca<sup>2+</sup> fluxes. T8.1 cells (A) or SLP-76 deficient Jurkat cells (J14) (B) were loaded to anti-CD3 alone or anti-CD3- and ICAM-1-coated plates for 60 min. (C) Fura-2 labeled GFP-T8.1, ADAP-T8.1, and M12-T8.1 cells were incubated with peptide pulsed APCs and Ca<sup>2+</sup> signals were recorded. (D) ADAP-T8.1 cells were pretreated with various inhibitors and loaded to ICAM-1-coated plates. Images were taken at 60 min and are representative of 2 independent experiments.

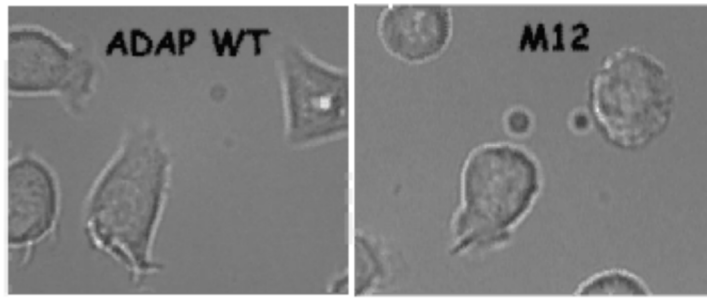

**Movie S1.** Time lapse was used to record cell morphology changes when ADAP-T8.1 or M12-T8.1 cells were seeded to anti-CD3- and ICAM-1-coated plates.

[Movie S1 \(AVI\)](#)

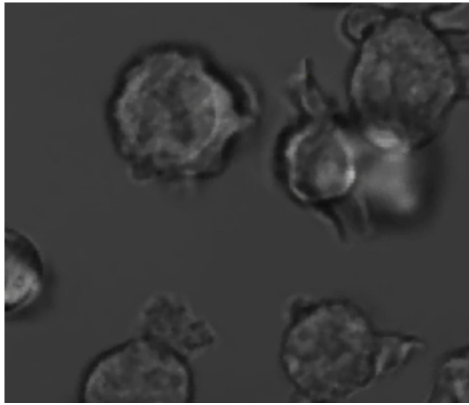

**Movie S2.** Time lapse was used to record cell morphology changes and cell migration when ADAP-T8.1 cells were loaded to ICAM-1 alone-coated plates.

[Movie S2 \(AVI\)](#)
